# Supplementary material
Source: HighWire-hosted journal article supplement (http://ajnr-stage2.highwire.org/highwire/filestream/52513/field_highwire_adjunct_files/0/3761_table.pdf)
Supplement: 3761_table.pdf [file 3761_table.pdf]

**On-line Table: Baseline characteristics of patients with different angiographic findings**

| Variable                     | Bleeding Sign (n = 40, 66%) |                                      |                   | No Bleeding Sign (n = 21, 34%) |                  | Total (N = 61) |
|------------------------------|-----------------------------|--------------------------------------|-------------------|--------------------------------|------------------|----------------|
|                              | Contrast Leakage (n = 10)   | Pseudoan + Contrast Leakage (n = 10) | Pseudoan (n = 20) | Staining <sup>a</sup> (n = 17) | Negative (n = 4) |                |
| Sex (No.)                    |                             |                                      |                   |                                |                  |                |
| Male                         | 9                           | 10                                   | 17                | 10                             | 3                | 49 (80%)       |
| Female                       | 1                           |                                      | 3                 | 7                              | 1                | 12 (20%)       |
| Age (mean) (range) (yr)      | 47 (31–63)                  | 55 (26–76)                           | 53 (19–80)        | 55 (10–89)                     | 58 (16–78)       | 53 (10–89)     |
| Presenting symptom           |                             |                                      |                   |                                |                  |                |
| Oral bleeding                | 6                           | 6                                    | 10                | 9                              | 1                | 32 (52%)       |
| Nasal bleeding               | 3                           | 3                                    | 6                 | 5                              | 3                | 20 (33%)       |
| H/N bleeding                 | 1                           | 1                                    | 4                 | 3                              |                  | 9 (15%)        |
| Bleeding cause               |                             |                                      |                   |                                |                  |                |
| Tumor after radiation        | 4                           | 5                                    | 15                | 7                              | 2                | 33 (54%)       |
| Tumor bleeding               |                             |                                      | 0                 | 3                              |                  | 3 (5%)         |
| Iatrogenic bleeding          | 1                           | 1                                    | 5                 | 4                              | 2                | 13 (21%)       |
| Trauma                       | 3                           | 2                                    |                   |                                |                  | 5 (8%)         |
| No evidence of a lesion      | 1                           |                                      |                   | 2                              |                  | 3 (5%)         |
| Others <sup>b</sup>          | 1                           | 2                                    | 0                 | 1                              |                  | 4 (7%)         |
| Lesion location              |                             |                                      |                   |                                |                  |                |
| ECA                          | 9                           | 5                                    | 9                 | 17                             |                  | 40 (66%)       |
| ICA, CCA, or bulb            | 1                           | 5                                    | 9                 |                                |                  | 15 (25%)       |
| Thyrocervical trunk          |                             |                                      | 2                 |                                |                  | 2 (3%)         |
| Not identified               |                             |                                      |                   |                                | 4                | 4 (6%)         |
| Procedure                    |                             |                                      |                   |                                |                  |                |
| Embolization                 | 9                           | 5                                    | 11                | 17                             | 4                | 46 (76%)       |
| Covered stent                | 1                           | 2                                    | 7                 |                                |                  | 10 (16%)       |
| Completely occluding ICA/CCA |                             | 3                                    | 2                 |                                |                  | 5 (8%)         |
| Retreatment                  | 2                           | 2 <sup>c</sup>                       | 8                 | 5                              |                  | 17 (26%)       |

**Note:**—Pseudoan indicates pseudoaneurysm; CL, contrast leakage; H/N, head and neck; CCA, common carotid artery.

<sup>a</sup> Tumor/hypervascular mucosal staining.

<sup>b</sup> Including 4 patients with intraosseous arteriovenous malformation, fungal sinusitis, a history of antiplatelet medication, and a history of liver transplantation, respectively.

<sup>c</sup> Including 1 patient with a pseudoaneurysm associated with a high-flow arteriovenous fistula.
